# Supplementary material
Source: PubMed Central journal article supplement (PMC4862546)
Supplement: AAC.02872-15_zac005165131so1.pdf [file AAC.02872-15_zac005165131so1.pdf]

**Figure S1. Relative mRNA expression level of genes implicated in MDR regulation (A), membrane efflux (B), permeability (C) for the ST131 H22 *E. coli* S250 and its mutants *in vitro*-selected by ertapenem (ETP), chloramphenicol (CMP) and cefoxitin (FOX).**

The log-transformed averages of relative fold change of mutants compared to the parent strain for each antibiotic are presented. The error bars represent the standard deviation from three different RNA preparations. Significant differences from parent S250 using Dunnett's test are indicated by \* ( $p < 0.05$ ), \*\* ( $p < 0.01$ ) and \*\*\* ( $p < 0.001$ ).

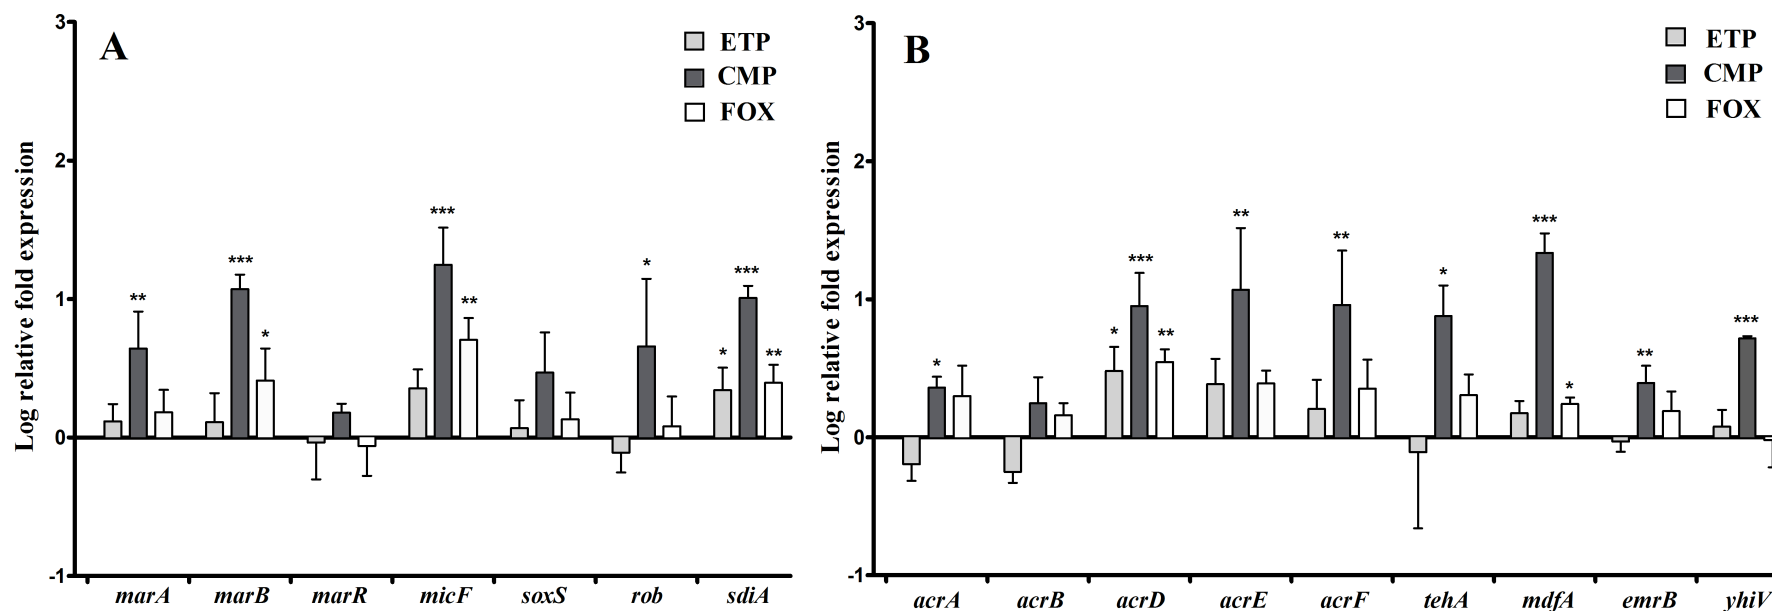

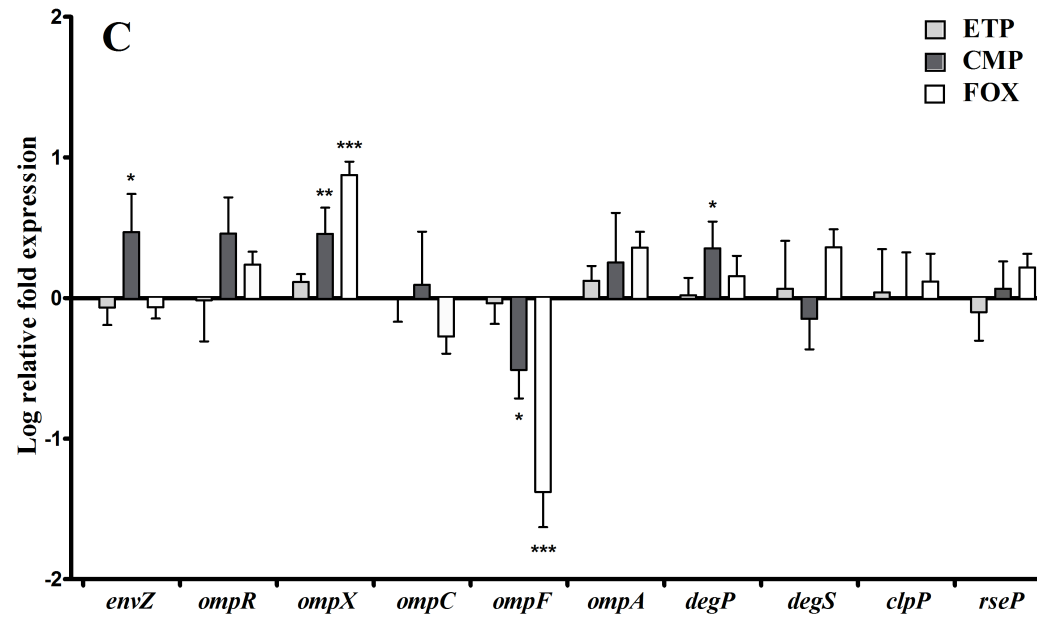

**Figure S2. Relative mRNA expression level of genes implicated in MDR regulation (A), membrane efflux (B), permeability (C) for the reference strain *E. coli* CFT073 and its mutants *in vitro*-selected by ertapenem (ETP), chloramphenicol (CMP) and ceftiofur (FOX).**

The log-transformed averages of relative fold change of mutants compared to the parent strain for each antibiotic are presented. The error bars represent the standard deviation from three different RNA preparations. Significant differences from parent CFT073 using Dunnett's test are indicated by \* ( $p < 0.05$ ), \*\* ( $p < 0.01$ ) and \*\*\* ( $p < 0.001$ ).

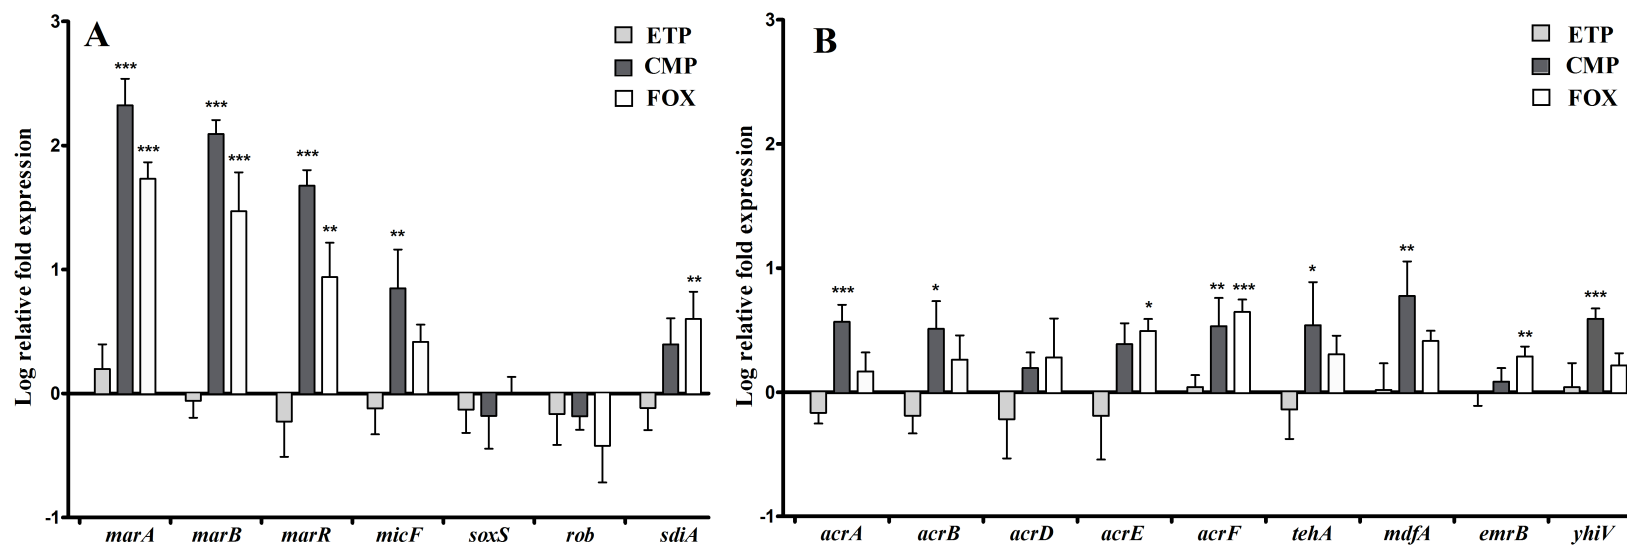

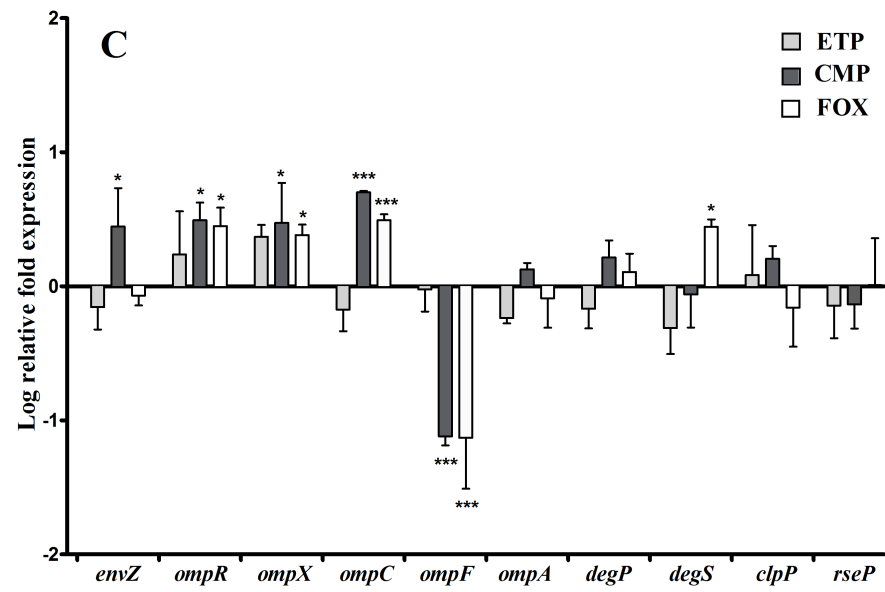

**Table S1. Primers used in the study.**

| Primer use and target function      | Target region      | Primer name                       | Oligonucleotide sequence                                 | Tm (°C)                                                      | Reference                                                |              |
|-------------------------------------|--------------------|-----------------------------------|----------------------------------------------------------|--------------------------------------------------------------|----------------------------------------------------------|--------------|
| <b>Sequencing</b>                   |                    |                                   |                                                          |                                                              |                                                          |              |
| Global regulator of drug resistance | <i>marOR</i>       | MarOR orab2                       | 5'-GCTAGCCTTGCATCGCAT-3'                                 | 56                                                           | (1)                                                      |              |
|                                     |                    | MarOR or1R                        | 5'-GAATGGTAATAGCGTCAG-3'                                 | 51.4                                                         |                                                          |              |
|                                     | <i>acrR</i>        | acrFR1                            | 5'-CTAACGCCTGTAAATTCACG-3'                               | 55.3                                                         | (1)                                                      |              |
|                                     |                    | acrRV1                            | 5'-CCAGGAAAAATCCTGGAGTCAG-3'                             | 60.3                                                         |                                                          |              |
|                                     | <i>soxRS</i>       | SoxRS seq_F                       | 5'-GGCGAAGCTTCCGCAGGTGTTTATGC-3'                         | 68                                                           | (2)                                                      |              |
| SoxRS seq_R                         |                    | 5'-CGTCGGGGGAAGCTTTC CTGTGTACC-3' | 69.5                                                     |                                                              |                                                          |              |
| <b>RT-PCR</b>                       |                    |                                   |                                                          |                                                              |                                                          |              |
| Housekeeping gene                   | <i>gapA</i>        | GAPDH_F<br>GAPDH_R                | 5'-ACTTACGAGCAGATCAAAGC-3'<br>5'-AGTTTCACGAAGTTGTCGTT-3' | 55.3<br>53.2                                                 | (3)                                                      |              |
| Global regulator of drug resistance | <i>marA</i>        | marA_F<br>marA_R                  | 5'-CATAGCATTTTGGACTGGAT-3'<br>5'-TACTTTCCTTCAGCTTTTGC-3' | 53.2<br>53.2                                                 | (3)                                                      |              |
|                                     |                    | <i>marB</i>                       | marB_F<br>marB_R                                         | 5'-ATAGCAGCTGCGCTTATTC-3'<br>5'-ACTTATCACTGCCAGTACCC-3'      |                                                          | 54.5<br>57.3 |
|                                     | <i>marR</i>        |                                   | marR_F<br>marR_R                                         | 5'-AGCGATCTGTTCAATGAAAT-3'<br>5'-TTCAGTTCAACCGGAGTAAT-3'     | 51.1<br>53.2                                             | (3)          |
|                                     |                    | <i>soxS</i>                       | soxS_F<br>soxS_R                                         | 5'-CCATTGCGATATCAAAAATC-3'<br>5'-ATCTTATCGCATGGATTGAC-3'     | 51.1<br>53.2                                             |              |
|                                     | <i>rob</i>         |                                   | rob_F<br>rob_R                                           | 5'-GTCGTCTTTATCCTGACTCG-3'<br>5'-TTTGTACCCTGGAAGATAC-3'      | 57.3<br>55.3                                             | (3)          |
|                                     |                    | <i>envZ</i>                       | envZ_F<br>envZ_R                                         | 5'-CGTTGAGGTCAACAAAAGTT-3'<br>5'-GTCGGTTCTGGATACGAATA-3'     | 53.2<br>55.3                                             |              |
|                                     | <i>micF</i>        |                                   | micF_F<br>micF_R                                         | 5'-TCATCATTAACCTTTATTTATTACCG-3'<br>5'-GCATCCGGTTGAAATAGG-3' | 53.1<br>53.7                                             | (3)          |
|                                     |                    | <i>sdiA</i>                       | sdiA_F<br>sdiA_R                                         | 5'-CTTTCGCGCACCAGTAACTG-3'<br>5'-CGCAGAAGAGGTCTACCATG-3'     | 59.4<br>59.4                                             |              |
|                                     | Efflux transporter |                                   | <i>acrA</i>                                              | acrA_F<br>acrA_R                                             | 5'-CTTAGCCCTAACAGGATGTG-3'<br>5'-TTGAAATTACGCTTCAGGAT-3' | 57.3<br>51.1 |
|                                     |                    | <i>acrB</i>                       |                                                          | acrB_F<br>acrB_R                                             | 5'-CGTACACAGAAAGTGCTCAA-3'<br>5'-CGCTTCAACTTTGTTTTCTT-3' | 55.3<br>51.1 |
|                                     |                    |                                   | <i>acrD</i>                                              | acrD_F<br>acrD_R                                             | 5'-GATTATCTTAGCCGCTTCAA-3'<br>5'-CAATGGAGGCTTTAACAAAC-3' | 53.2<br>53.2 |
|                                     |                    | <i>acrE</i>                       |                                                          | acrE_F                                                       | 5'-GCCCTCCTTTATTCTGATCT-3'                               | 55.3         |

|                             |                    |        |                              |      |     |
|-----------------------------|--------------------|--------|------------------------------|------|-----|
|                             |                    | acrE_R | 5'-GGCTATACGATAAGCATTGG-3'   | 55.3 |     |
|                             | <i>acrF</i>        | acrF_F | 5'-TAGCAATTTTCCTTTGTGGTT-3'  | 51.1 | (3) |
|                             |                    | acrF_R | 5'-CCTTTACCCTCTTTCTCCAT-3'   | 55.3 |     |
|                             | <i>emrB</i>        | emrB_F | 5'-ATTATGTATGCCGTCTGCTT-3'   | 53.2 | (3) |
|                             |                    | emrB_R | 5'-TTCGCGTAAAGTTAGAGAGG-3'   | 55.3 |     |
|                             | <i>mdfA</i>        | mdfA_F | 5'-TTTATGCTTTCGGTATTGGT-3'   | 51.1 | (3) |
|                             |                    | mdfA_R | 5'-GAGATTA AACAGTCCGTTGC-3'  | 55.3 |     |
|                             | <i>tehA</i>        | tehA_F | 5'-TGCTTCATTCTGGAGTTTCT-3'   | 53.2 | (3) |
|                             |                    | tehA_R | 5'-TCATTCTTTGTCCTCTGCTT-3'   | 53.2 |     |
|                             | <i>yhiV (mdtF)</i> | yhiV_F | 5'-GCACTCTATGAGAGCTGGTC-3'   | 59.4 | (3) |
|                             |                    | yhiV_R | 5'-CCTTCTTTCTGCATCATCTC-3'   | 55.3 |     |
| Outer membrane permeability | <i>ompF</i>        | ompF_F | 5'-GAAC TTCGCTGTT CAGTACC-3' | 57.3 | (3) |
|                             |                    | ompF_R | 5'-CGTACTTCAGACCAGTAGCC-3'   | 59.4 |     |
|                             | <i>ompC</i>        | ompC_F | 5'-CTTCAAAGGTGAAACTCAGG-3'   | 55.3 | (3) |
|                             |                    | ompC_R | 5'-GTTGTCAGAACCGTAGGTGT-3'   | 57.3 |     |
|                             | <i>ompA</i>        | ompA_F | 5'-ACGACTGGTTAGGTCGTATG-3'   | 57.3 | (3) |
|                             |                    | ompA_R | 5'-ACGTTGGATTTAGTGTCTGC-3'   | 55.3 |     |
|                             | <i>ompX</i>        | ompX_F | 5'-ACCTGAAAATACCGCTATGAA-3'  | 53.2 | (3) |
|                             |                    | ompX_R | 5'-TCAGTGGTCTGGAATTTACC-3'   | 55.3 |     |
|                             | <i>ompR</i>        | ompR_F | 5'-GACGTCTTCGTAGTCAGAGC-3'   | 59.4 | (3) |
|                             |                    | ompR_R | 5'-TTGAACTTACCGAAAAGCAAT-3'  | 51.1 |     |
|                             | <i>degP</i>        | degP_F | 5'-TGGTAGTGAACAACGTGAAA-3'   | 53.2 | (3) |
|                             |                    | degP_R | 5'-AACAGGTAGATGGTGCTGTC-3'   | 57.3 |     |
|                             | <i>clpP</i>        | clpP_F | 5'-CAAAAGGTAAACGTTTTTGC-3'   | 51.1 | (3) |
|                             |                    | clpP_R | 5'-AATGATTGACCCGTATGAAG-3'   | 53.2 |     |
|                             | <i>rseP</i>        | rseP_F | 5'-TTGTTTATTACCTGCCGTTT-3'   | 51.1 | (3) |
|                             |                    | rseP_R | 5'-ATTAACAGCACCAGCAGAAT-3'   | 53.2 |     |
|                             | <i>degS</i>        | degS_F | 5'-TTCCAGTTAGCAACCAAAAT-3'   | 51.1 | (3) |
|                             |                    | degS_R | 5'-TGACACTTCATTAACCACGA-3'   | 53.2 |     |

## References:

1. Nicoloff H, Perreten V, Levy SB. 2007. Increased genome instability in *Escherichia coli lon* mutants: Relation to emergence of multiple-antibiotic-resistant (Mar) mutants caused by insertion sequence elements and large tandem genomic amplifications. *Antimicrob Agents Chemother* **51**:1293–1303.

2. **Koutsolioutsou A, Peña-Llopis S, Demple B.** 2005. Constitutive *soxR* mutations contribute to multiple-antibiotic resistance in clinical *Escherichia coli* isolates. *Antimicrob Agents Chemother* **49**:2746–2752.
3. **Viveiros M, Dupont M, Rodrigues L, Couto I, Davin-Regli A, Martins M, Pagès JM, Amaral L.** 2007. Antibiotic stress, genetic response and altered permeability of *E. coli*. *PLoS One* **2**:e365.
4. **Tavío MM, Aquili VD, Poveda JB, Antunes NT, Sánchez-Céspedes J, Vila J.** 2010. Quorum-sensing regulator *sdiA* and *marA* overexpression is involved in *in vitro*-selected multidrug resistance of *Escherichia coli*. *J Antimicrob Chemother* **65**:1178–1186.
